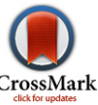

## Correction

# Correction: Genetic Architecture of Palm Oil Fatty Acid Composition in Cultivated Oil Palm (*Elaeis guineensis* Jacq.) Compared to Its Wild Relative *E. oleifera* (H.B.K) Cortés

The PLOS ONE Staff

Figure 2 is missing parts B and C. The authors have provided a corrected version below.

---

**Citation:** The PLOS ONE Staff (2014) Correction: Genetic Architecture of Palm Oil Fatty Acid Composition in Cultivated Oil Palm (*Elaeis guineensis* Jacq.) Compared to Its Wild Relative *E. oleifera* (H.B.K) Cortés. PLoS ONE 9(6): e101628. doi:10.1371/journal.pone.0101628

**Published:** June 24, 2014

**Copyright:** © 2014 The PLOS ONE Staff. This is an open-access article distributed under the terms of the Creative Commons Attribution License, which permits unrestricted use, distribution, and reproduction in any medium, provided the original author and source are credited.

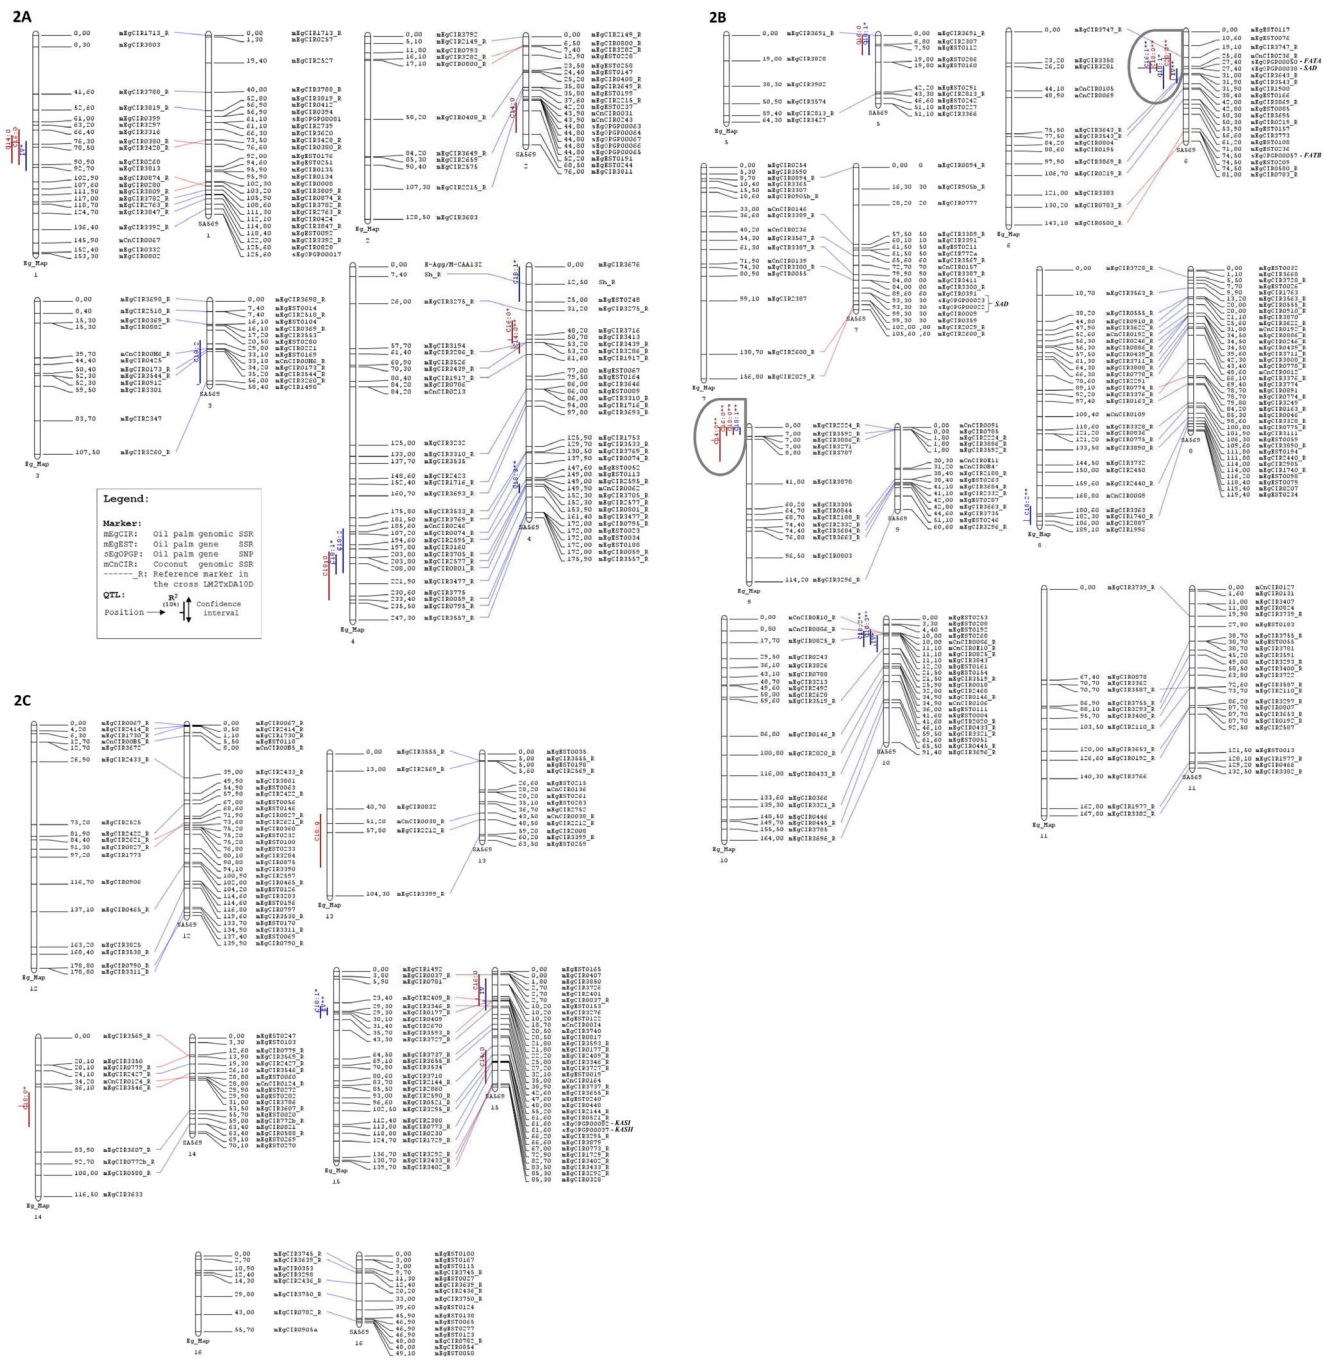

**Figure 2. Sixteen QTLs of palm oil fatty acid proportions and iodine value identified in the *E. guineensis* cross LM2T x DA10D, located on the consensus linkage map in oil palm (Eg\_Map) of Billotte *et al.* [36] and compared to the QTL map for same traits published by Montoya *et al.* [27] in the interspecific *Elaeis pseudo-backcross* SA569.** Note: Each microsatellite linkage map has 16 linkage groups corresponding to the 16 homologous pairs of chromosomes of the *Elaeis* genome. The *E. guineensis* Eg\_Map (253 loci) is sharing 156 marker loci in common and good co-linearity with the linkage map of the pseudo-backcross SA569 (362 loci). The QTLs were identified by the Kruskal-Wallis, IM and MQM methods. One star (\*) or two stars (\*\*): QTL detected by the MQM method at the genome-wide  $\alpha$  threshold value of 5% or 1% respectively. No star: putative QTL as only detected by the Kruskal-Wallis test at  $p < 0.005$ . The names and the positions (cM) of the markers are given on the right side of the linkage groups. mEgCIRxxxx: *E. guineensis* SSR loci. sEgOPGPxxxx: *E. guineensis* gene SNP loci. mCnCIRxxxx: *Cocos nucifera* SSR loci. Marker loci common to both maps are indicated by an extension "R". The names, positions and confidence regions of the QTLs are given on the left side of the linkage groups. In red: are figured the QTLs of saturated fatty acid proportion; in blue: the QTLs of unsaturated fatty acid proportion and of iodine value.  
doi:10.1371/journal.pone.0095412.g001

## Reference

1. Montoya C, Cochard B, Flori A, Cros D, Lopes R, et al. (2014) Genetic Architecture of Palm Oil Fatty Acid Composition in Cultivated Oil Palm (*Elaeis guineensis* Jacq.) Compared to Its Wild Relative *E. oleifera* (H.B.K) Cortés. PLoS ONE 9(5): e95412. doi:10.1371/journal.pone.0095412
